# Supplementary material
Source: PubMed Central journal article supplement (PMC7674527)
Supplement: 12264_2020_549_MOESM1_ESM.pdf [file 12264_2020_549_MOESM1_ESM.pdf]

# Supplementary Materials

**Table. S1** Gender differences from stress questionnaires and behavioral data

| Measures               |            | Gender ( $n = 72$ )                      |                                     | $t$           | $P^a$  |       |
|------------------------|------------|------------------------------------------|-------------------------------------|---------------|--------|-------|
| Target                 | Cue Type   | Females<br>( $n = 36$ )<br>Mean $\pm$ SD | Males ( $n = 36$ )<br>Mean $\pm$ SD |               |        |       |
| ACC                    | No Cue     | 0.95(0.05)                               | 0.93(0.07)                          | 1.345         | 0.183  |       |
|                        | Center Cue | 0.99(0.03)                               | 0.98(0.03)                          | 0.186         | 0.853  |       |
|                        | Cong       | Double Cue                               | 0.95(0.04)                          | 0.94(0.07)    | 1.313  | 0.193 |
|                        |            | Spatial Cue                              | 0.99(0.04)                          | 0.99(0.04)    | 0.165  | 0.869 |
|                        | Incong     | No Cue                                   | 0.96(0.04)                          | 0.94(0.06)    | 1.482  | 0.143 |
|                        |            | Center Cue                               | 0.98(0.03)                          | 0.98(0.04)    | 0.540  | 0.591 |
|                        |            | Double Cue                               | 0.95(0.05)                          | 0.93(0.07)    | 1.571  | 0.121 |
|                        |            | Spatial Cue                              | 0.99(0.03)                          | 0.98(0.03)    | 0.489  | 0.627 |
| RT                     | No Cue     | 534.58 (47.74)                           | 547.51(59.26)                       | -1.020        | 0.311  |       |
|                        | Center Cue | 594.89(56.10)                            | 599.12(62.14)                       | -0.304        | 0.762  |       |
|                        | Cong       | Double Cue                               | 509.91(49.80)                       | 527.42(62.41) | -1.316 | 0.193 |
|                        |            | Spatial Cue                              | 598.10(58.57)                       | 598.50(64.82) | -0.027 | 0.978 |
|                        | Incong     | No Cue                                   | 534.63(52.48)                       | 546.65(53.20) | -0.965 | 0.338 |
|                        |            | Center Cue                               | 594.63(57.28)                       | 598.16(59.81) | -0.256 | 0.799 |
|                        |            | Double Cue                               | 508.37(50.50)                       | 521.79(54.08) | -1.088 | 0.280 |
|                        |            | Spatial Cue                              | 590.41(54.02)                       | 597.81(59.49) | -0.553 | 0.582 |
| Perceived Stress Scale |            | 27.58(9.55)                              | 27.44(9.89)                         | 0.061         | 0.952  |       |

<sup>a</sup> Significance level for two-tailed independent-samples  $t$  test.

**Table. S2** Mean amplitude values from chronically stressed and non-stressed adults in each cue and target condition

| Measures     |          | Amplitude ( $n = 72$ )<br>Mean $\pm$ SD |             |             |             |
|--------------|----------|-----------------------------------------|-------------|-------------|-------------|
| Group        | Cue Type | No Cue                                  | Center Cue  | Double Cue  | Spatial Cue |
| Stressed     | N1       | -0.34(0.15)                             | -0.96(0.25) | -0.56(0.36) | -1.55(0.37) |
|              | N2       | -0.49(0.15)                             | -1.21(0.41) | -1.51(0.55) | -1.45(0.59) |
|              | P2       | -1.82(0.11)                             | 0.58(0.32)  | 0.41(0.42)  | 1.63(0.45)  |
|              | P3       | -0.70(0.20)                             | -1.09(0.35) | -0.96(0.46) | -1.03(0.49) |
| Non-stressed | N1       | -0.71(0.15)                             | -1.67(0.26) | -1.25(0.37) | -2.69(0.39) |
|              | N2       | -0.88(0.16)                             | -2.99(0.43) | -4.08(0.58) | -4.64(0.62) |
|              | P2       | -0.28(0.11)                             | 0.67(0.33)  | 0.64(0.44)  | 2.34(0.47)  |
|              | P3       | -1.30(0.22)                             | -2.53(0.38) | -2.70(0.49) | -3.25(0.53) |

**Table. S3** Mean amplitude values for chronically stressed and non-stressed adults in each target condition

| Measures     |             | Amplitude ( $n= 72$ )<br>Mean $\pm$ SD |            |
|--------------|-------------|----------------------------------------|------------|
| Group        | Target Type | Cong                                   | Incong     |
| Stressed     | N2          | 0.85(0.47)                             | 1.36(0.58) |
|              | P3          | 1.17(0.43)                             | 2.38(0.56) |
| Non-stressed | N2          | 2.46(0.55)                             | 3.13(0.67) |
|              | P3          | 2.89(0.45)                             | 4.32(0.58) |
